# Supplementary material
Source: publisher figshare collection journal article supplement (https://gsajournals.figshare.com/articles/dataset/_/12904568)
Supplement: Supplementary file 1 [file 1]

## Supplemental Material Legend

### Fig. S1. Generation of *Tfap2b*<sup>K144</sup> and *Tfap2b*<sup>K145</sup> mutant mice.

(A) Result of direct sequencing around the 5' end of intron 3 in a *Tfap2b*<sup>K144/+</sup> mouse. (B) Results of dCAPS for genotyping of WT, *Tfap2b*<sup>K144/+</sup>, and *Tfap2b*<sup>K144/K144</sup> mice. (C) Result of direct sequencing around the boundary of intron 4 and exon 5 in a *Tfap2b*<sup>K145/+</sup> mouse. Note that the results of sequencing of the anti-sense DNA is shown. (D) Results of dCAPS for genotyping of WT, *Tfap2b*<sup>K145/+</sup>, and *Tfap2b*<sup>K145/K145</sup> mice.

### Fig. S2. Direct sequencing of *Tfap2b* mRNA in *Tfap2b* mutant mice.

Nucleotide sequence alignment of *Tfap2b* mRNA around exon 3-6. Each lane represents an individual mouse. *N*=3 mice.

### Fig. S3. Whole images of Western blots (related to Fig. 2).

(A-C) Images corresponding to Fig. 2C (A), Fig. 2D (B), and Fig. 2E (C).

### Fig. S4. Comparison of EEG power spectra in adult *Tfap2b*<sup>+/+</sup> and *Tfap2b*<sup>+/-</sup> mice.

Comparison of the EEG power spectrum of wakefulness, NREMS, and REMS for 24 h between male (A) or female (B) *Tfap2b*<sup>+/+</sup> and *Tfap2b*<sup>+/-</sup> mice. *N*=7 *Tfap2b*<sup>+/+</sup> male mice, *N*=5 *Tfap2b*<sup>+/-</sup> male mice, *N*=5 *Tfap2b*<sup>+/+</sup> female mice, *N*=3 *Tfap2b*<sup>+/-</sup> female mice. † indicates significant interaction between frequency and genotype in two-way repeated-measures ANOVA († † *P* < 0.01; † † † † *P* < 0.0001). \* indicates significance in post-hoc Bonferroni multiple comparison test (\*\**P* < 0.01, \*\*\*\**P* < 0.0001). Data are mean ± s.e.m.

### Fig. S5. Comparison of EEG power spectra in adult *Tfap2b*<sup>+/+</sup> and *Tfap2b*<sup>K145/+</sup> mice.

Comparison of the EEG power spectrum of wakefulness, NREMS, and REMS for 24 h between male (A) or female (B) *Tfap2b*<sup>+/+</sup> and *Tfap2b*<sup>K145/+</sup> mice. *N*=5 *Tfap2b*<sup>+/+</sup> male mice, *N*=7 *Tfap2b*<sup>K145/+</sup> male mice, *N*=8 *Tfap2b*<sup>+/+</sup> female mice, *N*=9 *Tfap2b*<sup>K145/+</sup> female mice. † indicates significant interaction between frequency and genotype in two-way repeated-measures ANOVA († *P* < 0.05). \* indicates significance in post-hoc Bonferroni multiple comparison test (\*\**P* < 0.01, \*\*\**P* < 0.001, \*\*\*\**P* < 0.0001). Data are mean ± s.e.m.

### Fig. S6. Comparison of EEG power spectra in adult *Tfap2b*<sup>+/+</sup> and *Tfap2b*<sup>K144/+</sup> male mice.

Comparison of the EEG power spectrum of wakefulness, NREMS, and REMS for 24 h between male (A) or female (B) *Tfap2b*<sup>+/+</sup> and *Tfap2b*<sup>K144/+</sup> mice. *N*=7 *Tfap2b*<sup>+/+</sup> male mice, *N*=4 *Tfap2b*<sup>K144/+</sup> male mice. Data are mean  $\pm$  s.e.m.

**Fig. S7. Comparison of bi-hourly changes in NREMS delta density.**

(A-C) Comparison of bi-hourly changes in NREMS delta density in male mice between *Tfap2b*<sup>+/+</sup> and *Tfap2b*<sup>+/-</sup> mice (A), *Tfap2b*<sup>+/+</sup> and *Tfap2b*<sup>K145/+</sup> mice (B), and *Tfap2b*<sup>+/+</sup> and *Tfap2b*<sup>K144/+</sup> mice (C). (D, E) Comparison of bi-hourly changes in NREMS delta density in female mice between *Tfap2b*<sup>+/+</sup> and *Tfap2b*<sup>+/-</sup> mice (D), *Tfap2b*<sup>+/+</sup> and *Tfap2b*<sup>K145/+</sup> mice (E). (A) *N*=7 *Tfap2b*<sup>+/+</sup> mice, *N*=5 *Tfap2b*<sup>+/-</sup> mice. (B) *N*=5 *Tfap2b*<sup>+/+</sup> mice, *N*=7 *Tfap2b*<sup>K145/+</sup> mice. (C) *N*=7 *Tfap2b*<sup>+/+</sup> mice, *N*=4 *Tfap2b*<sup>K144/+</sup> mice. (D) *N*=5 *Tfap2b*<sup>+/+</sup> mice, *N*=3 *Tfap2b*<sup>+/-</sup> mice. (E) *N*=8 *Tfap2b*<sup>+/+</sup> mice, *N*=9 *Tfap2b*<sup>K145/+</sup> mice. † indicates significant interaction between ZT and genotype in two-way repeated-measures ANOVA († † † *P* < 0.001). Data are mean  $\pm$  s.e.m.
